# Supplementary material for: Unique Characteristics of the Pyrrolysine System in the 7th Order of Methanogens: Implications for the Evolution of a Genetic Code Expansion Cassette
Source: Hindawi journal article supplement (doi:10.1155/2014/374146), 2014-01-01
Supplement: f1 [file 374146.f1.pdf]

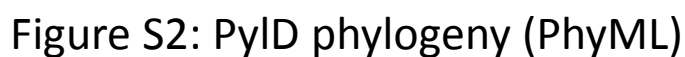

In black, bacterial PyD – in blue, Methanosarcinaceae PyD – in red, 7th methanogenic order PyD

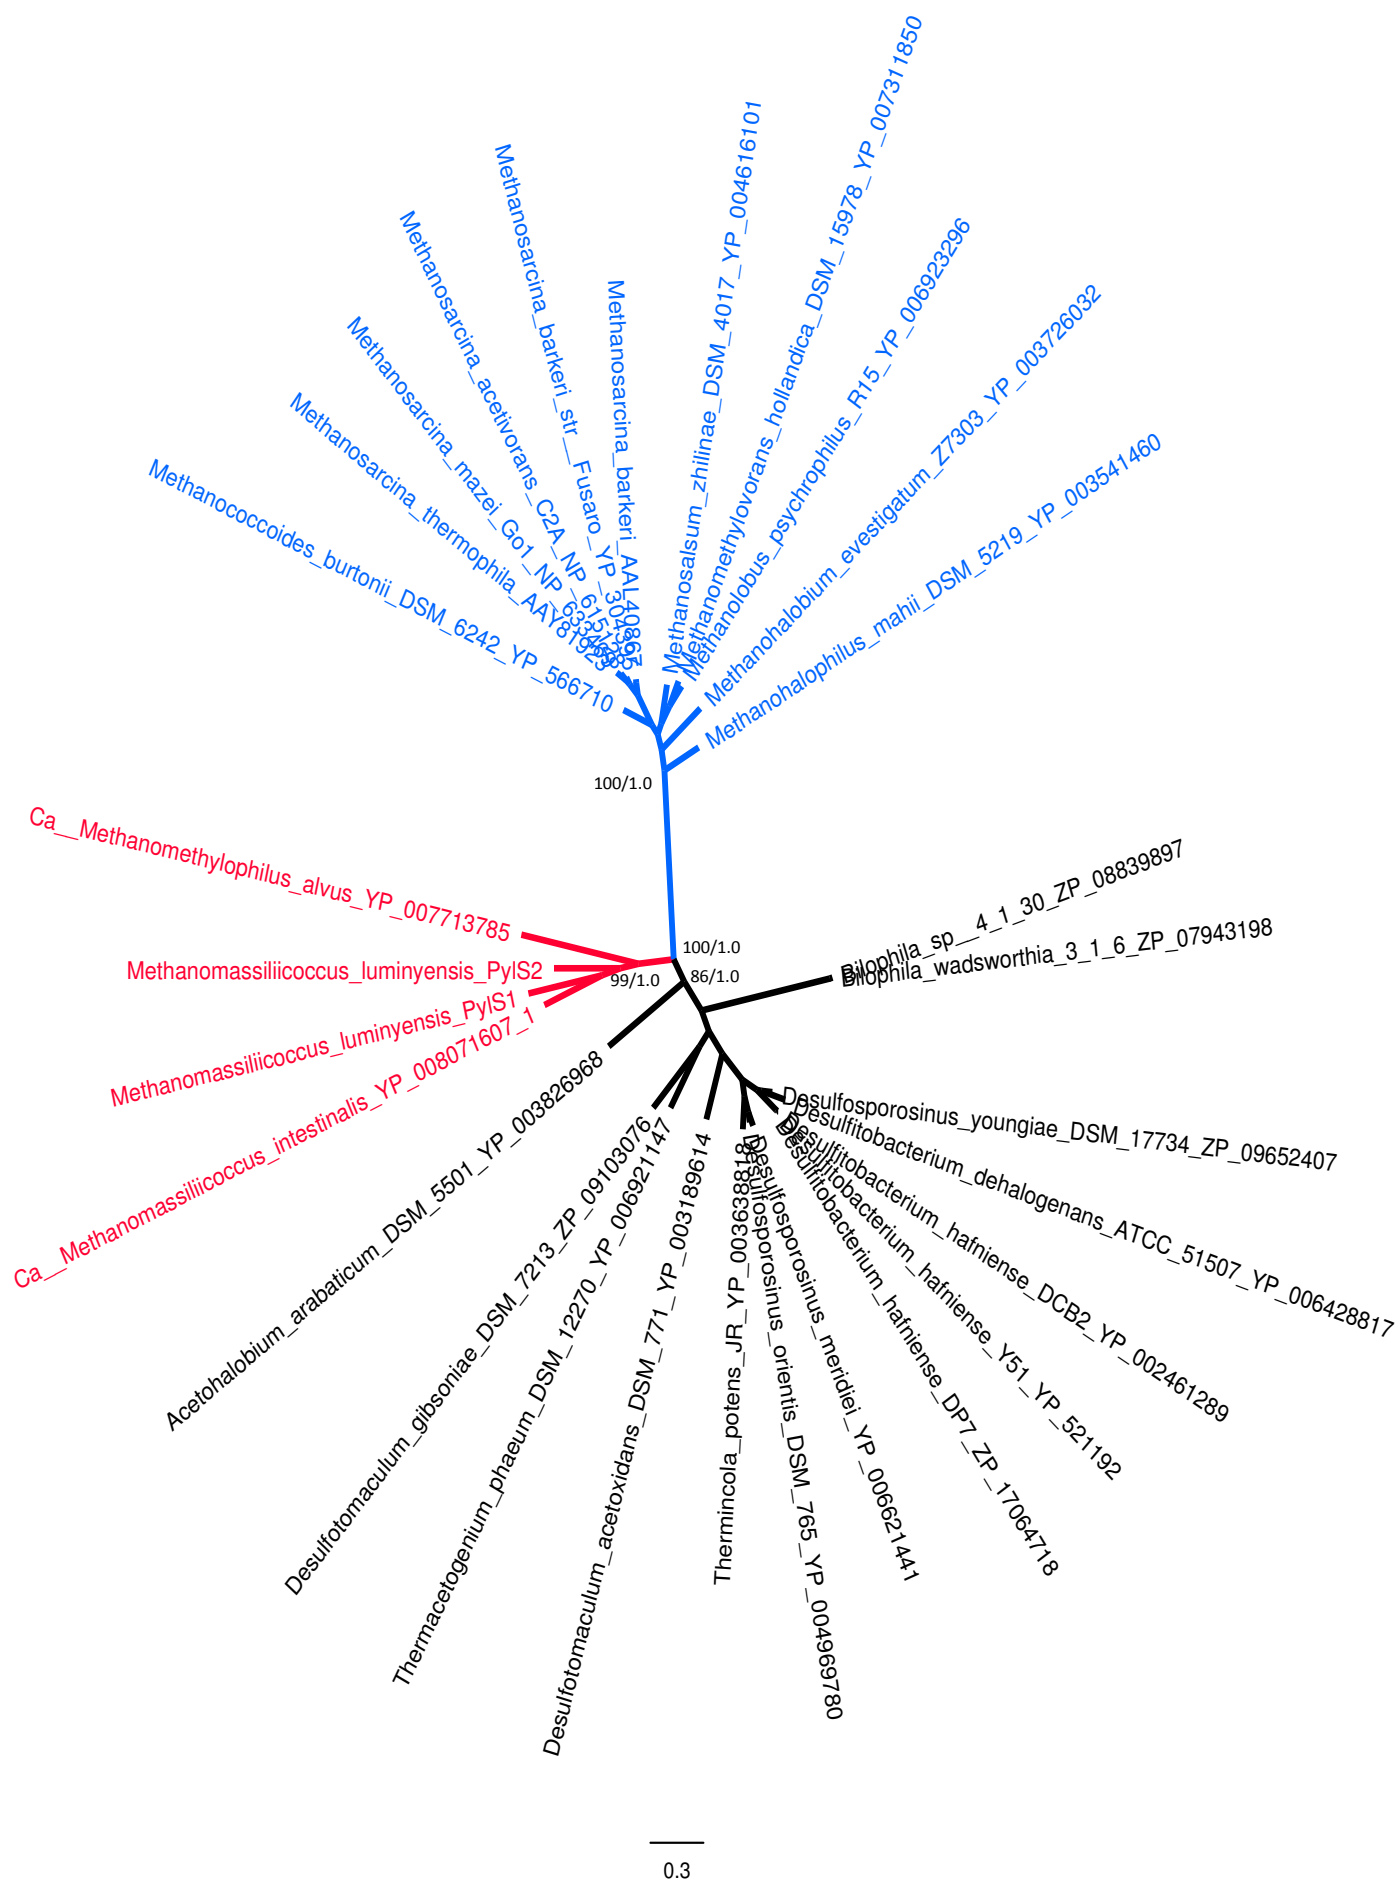

Figure S3: PylS phylogeny (PhyML)

In black, bacterial PylS – in blue, Methanosarcinaceae PylS – in red, 7th methanogenic order PylS
